# Supplementary material
Source: MDPI journal article supplement (https://www.mdpi.com/1099-4300/21/7/654)
Supplement: s1 [file s1]

Table S2: Justification of secondary structure predictors measured on PDB dataset (the reported numbers represent fraction of correctly predicted residues in a three state model - helix, sheet, coil)

| method       | consensus | spider3 | psipred | predator | jnet | simpa | GOR IV |
|--------------|-----------|---------|---------|----------|------|-------|--------|
| precision[%] | 73.0      | 78.0    | 72.0    | 65.8     | 65.1 | 68.4  | 63.2   |
